# Supplementary material
Source: PubMed Central journal article supplement (PMC1622826)

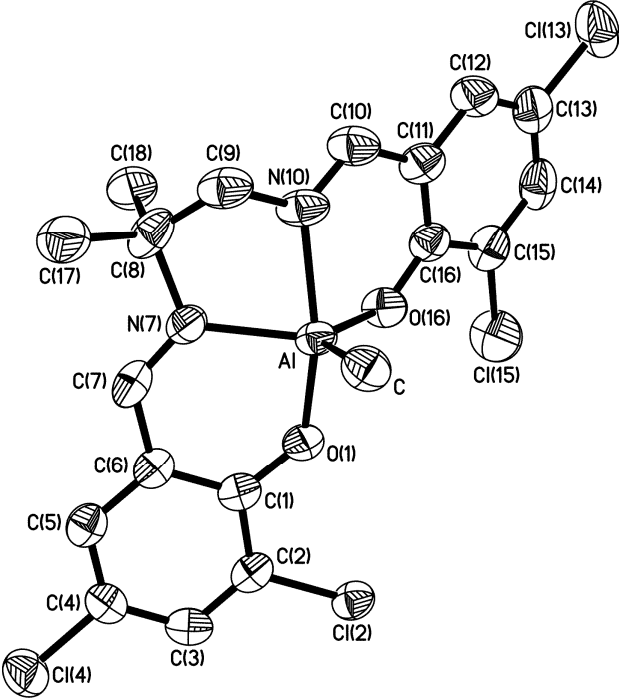

Supplement: pnas_0602765103_1.pdf [file pnas_0602765103_1.pdf]

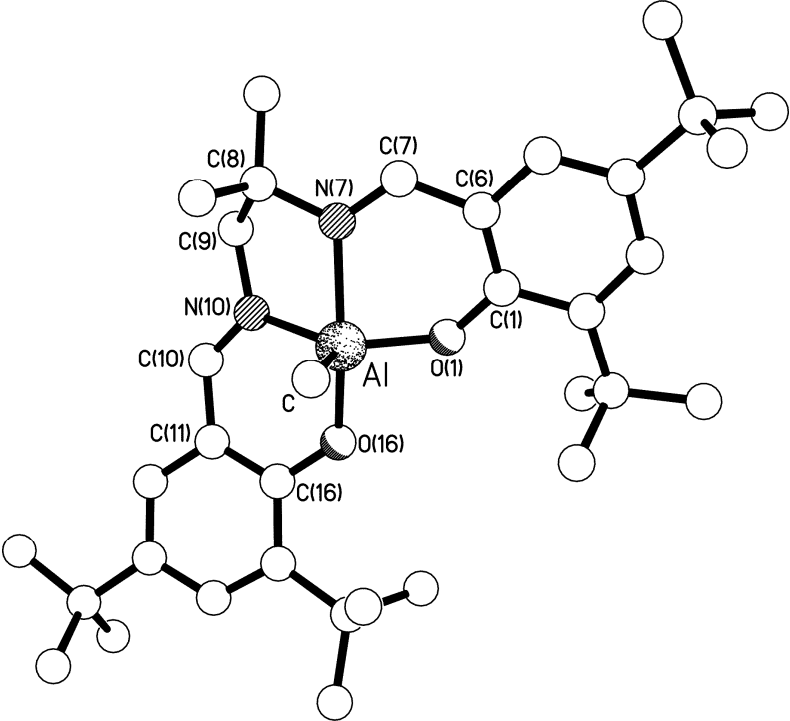

Supplement: pnas_0602765103_10.pdf [file pnas_0602765103_10.pdf]

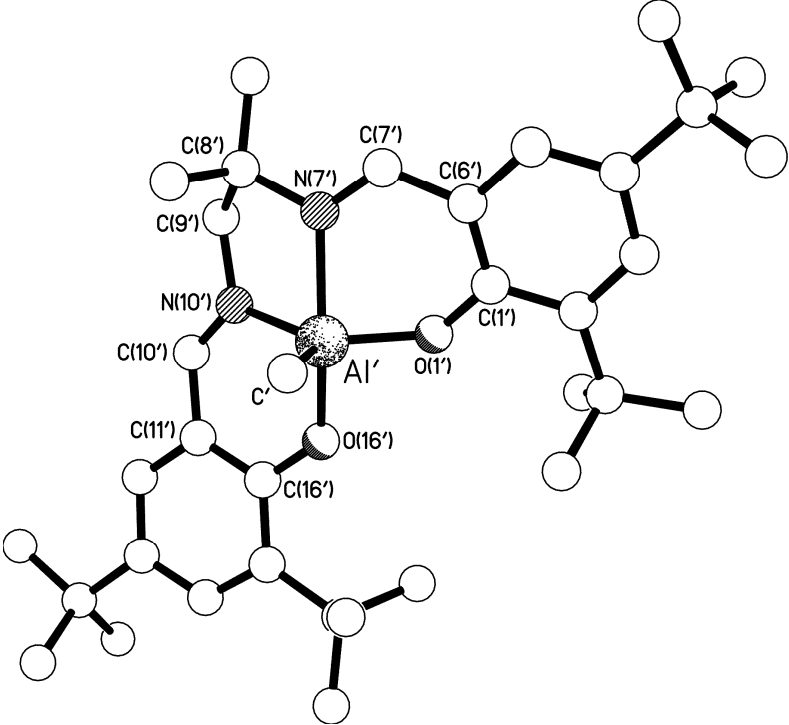

Supplement: pnas_0602765103_11.pdf [file pnas_0602765103_11.pdf]

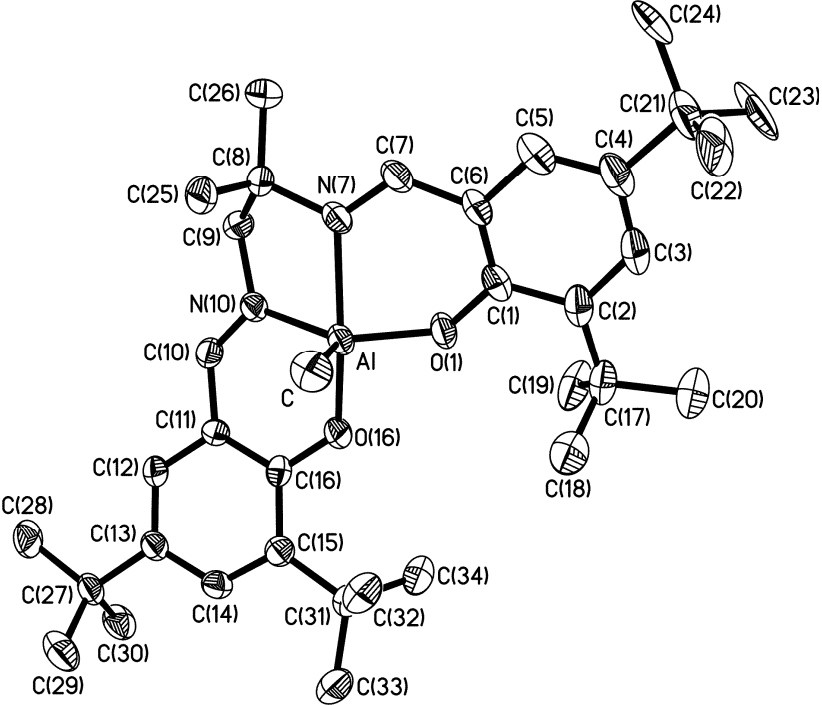

Supplement: pnas_0602765103_12.pdf [file pnas_0602765103_12.pdf]

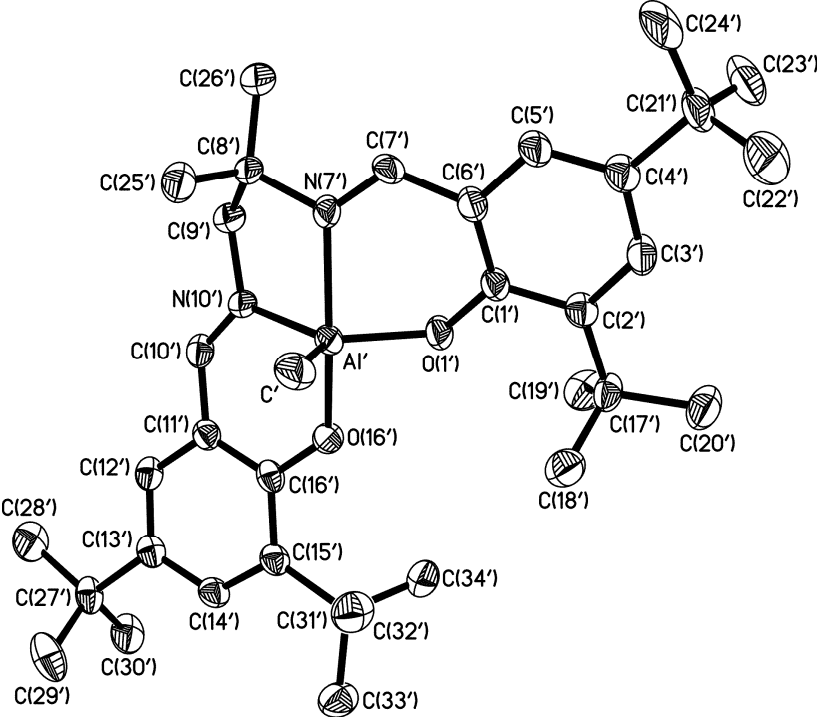

Supplement: pnas_0602765103_13.pdf [file pnas_0602765103_13.pdf]

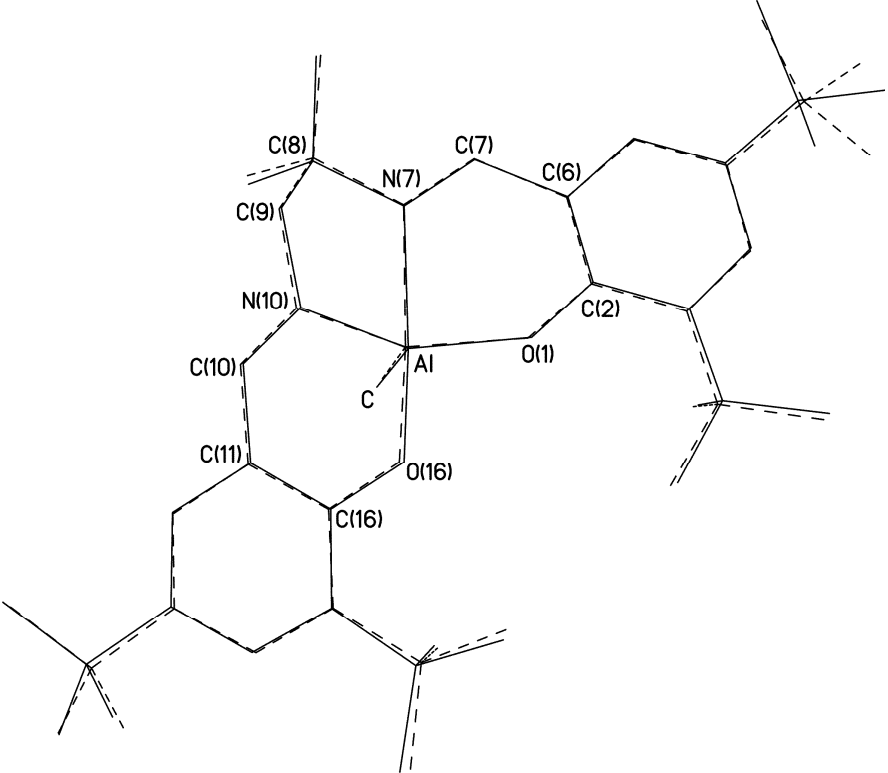

Supplement: pnas_0602765103_14.pdf [file pnas_0602765103_14.pdf]

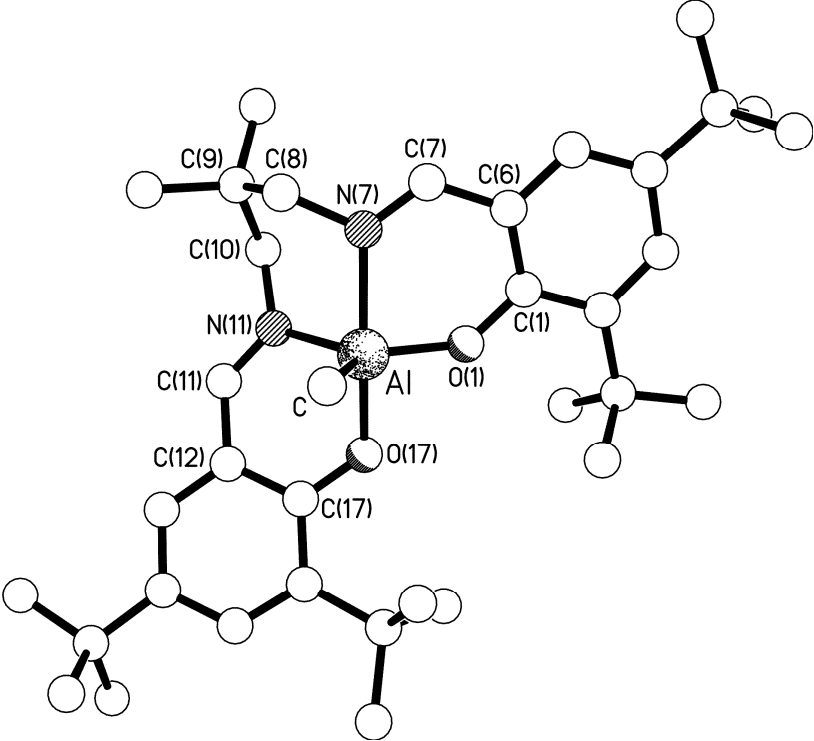

Supplement: pnas_0602765103_15.pdf [file pnas_0602765103_15.pdf]

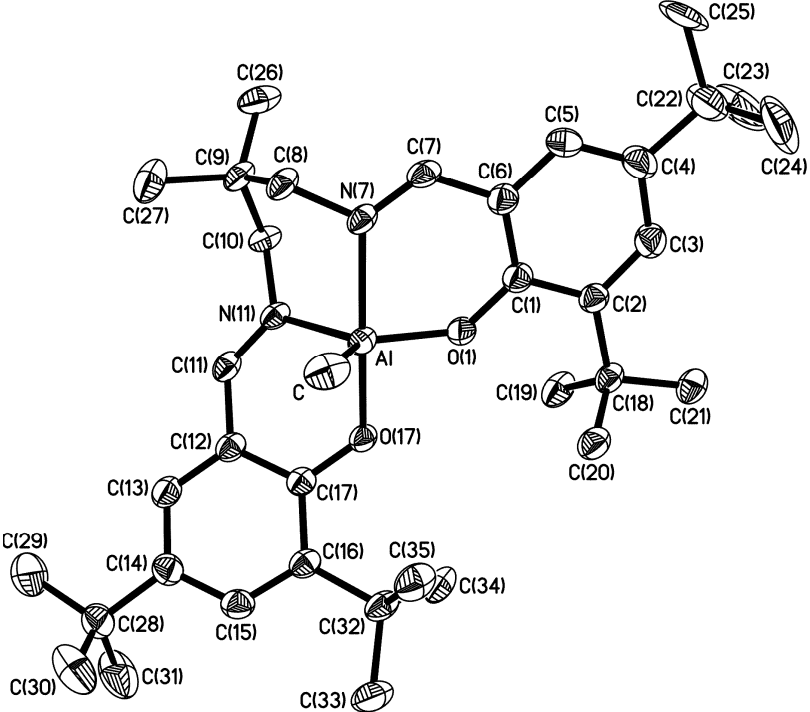

Supplement: pnas_0602765103_16.pdf [file pnas_0602765103_16.pdf]

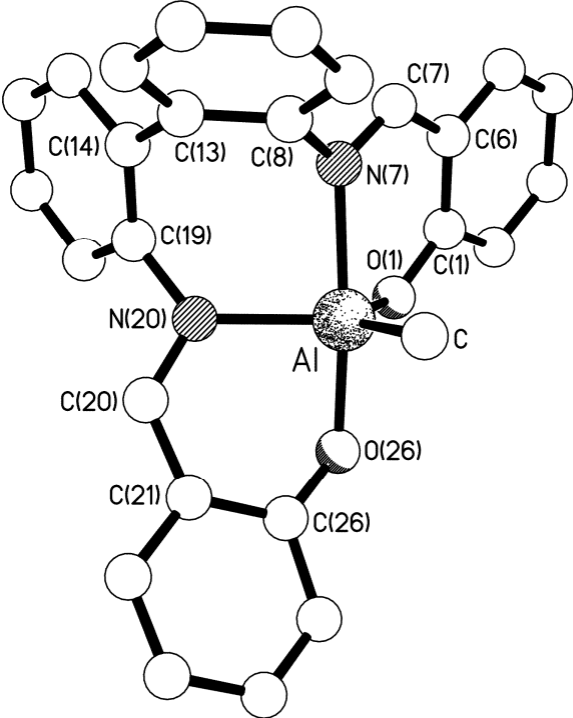

Supplement: pnas_0602765103_17.pdf [file pnas_0602765103_17.pdf]

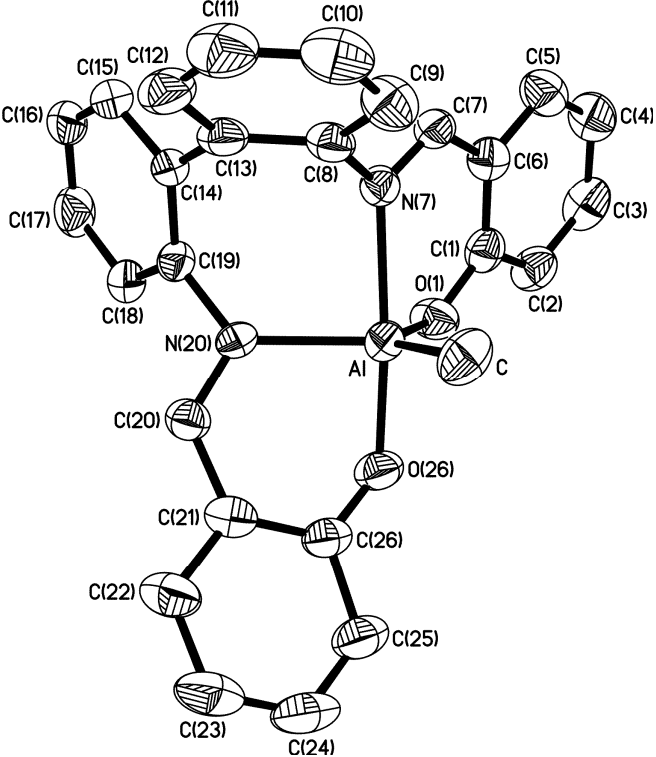

Supplement: pnas_0602765103_18.pdf [file pnas_0602765103_18.pdf]

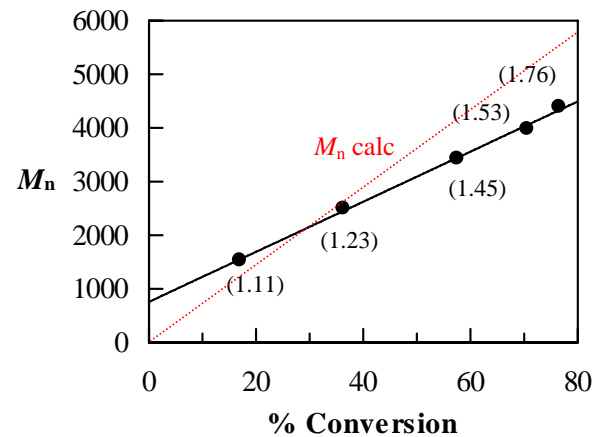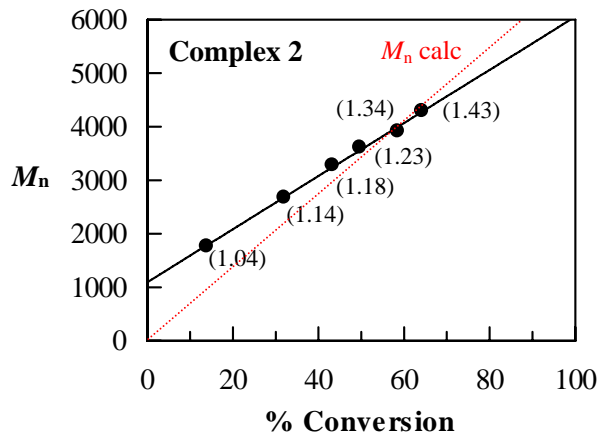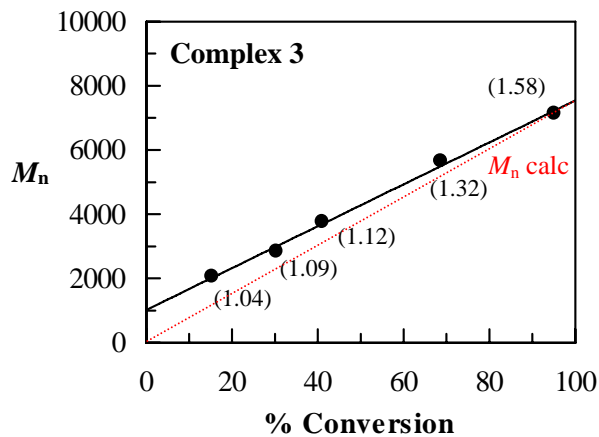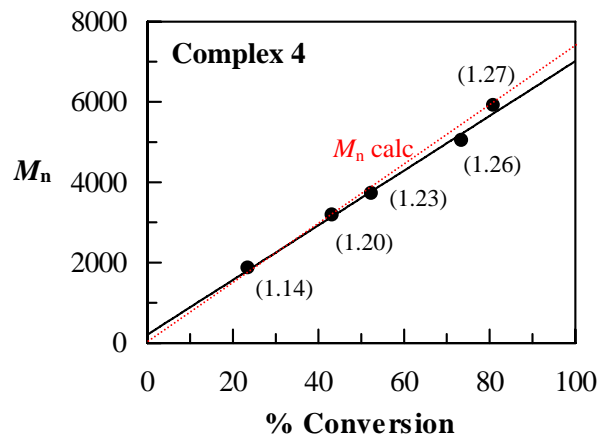

Supplement: pnas_0602765103_19.pdf [file pnas_0602765103_19.pdf]

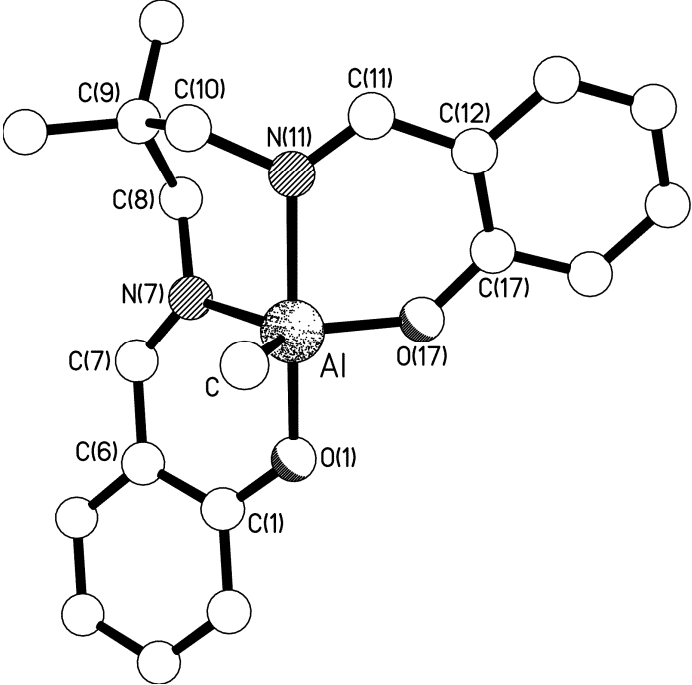

Supplement: pnas_0602765103_2.pdf [file pnas_0602765103_2.pdf]

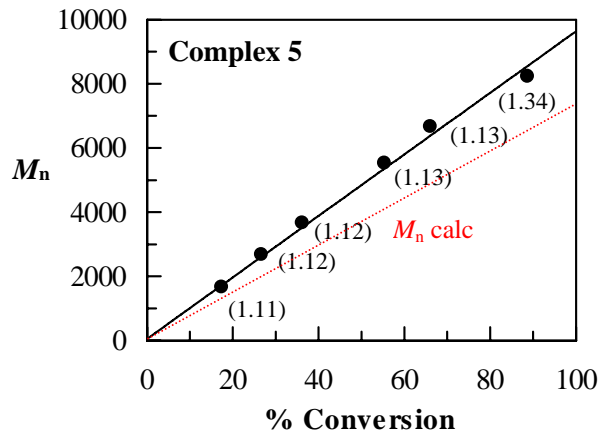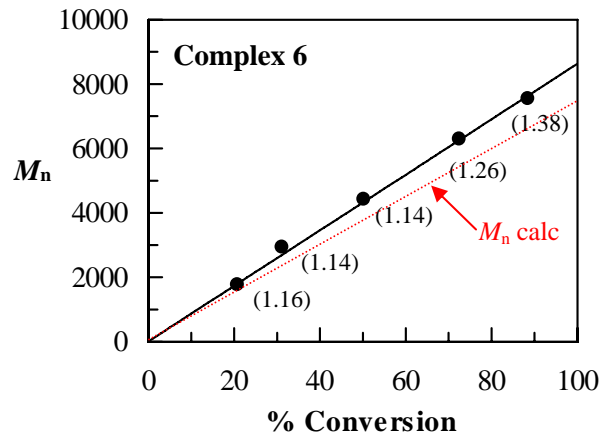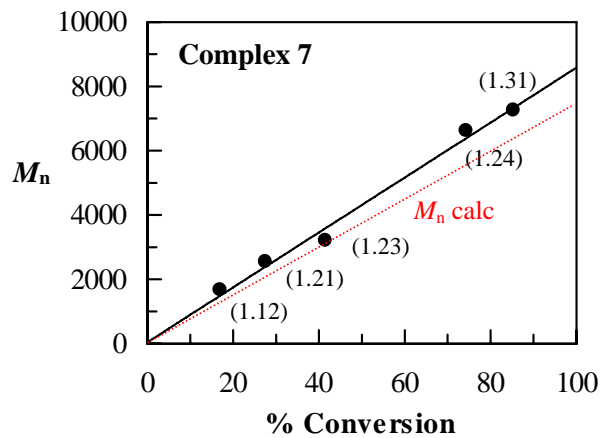

Supplement: pnas_0602765103_20.pdf [file pnas_0602765103_20.pdf]

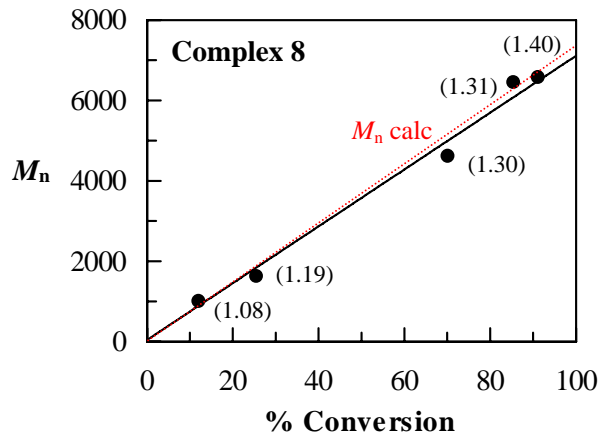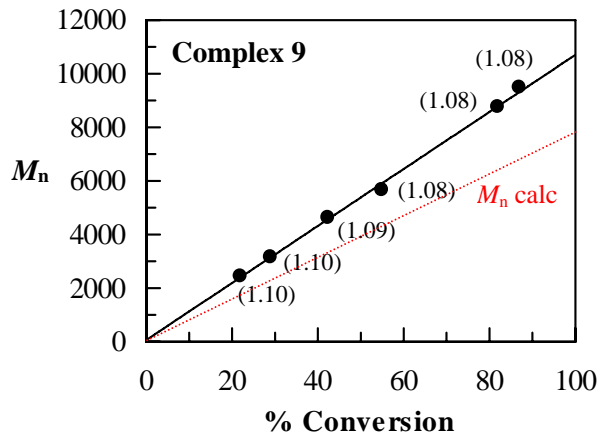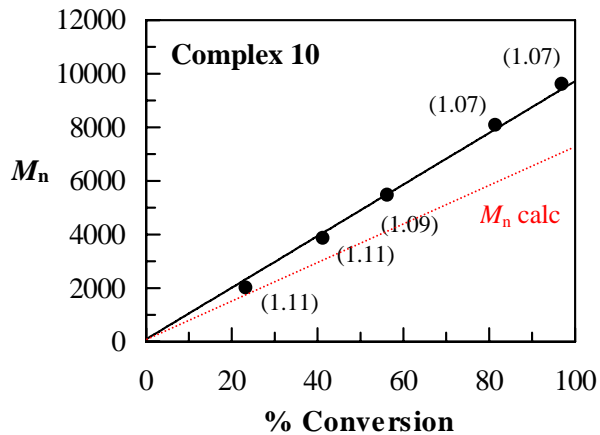

Supplement: pnas_0602765103_21.pdf [file pnas_0602765103_21.pdf]

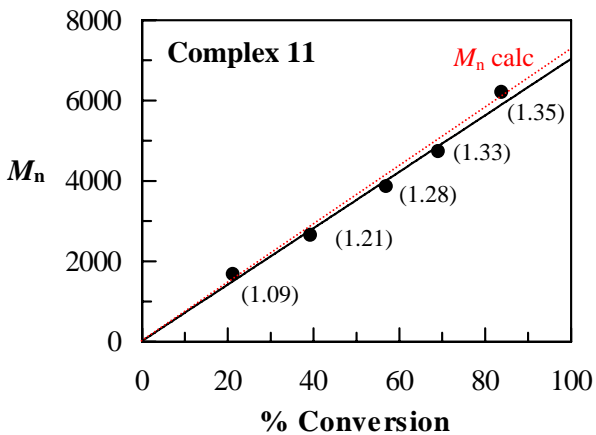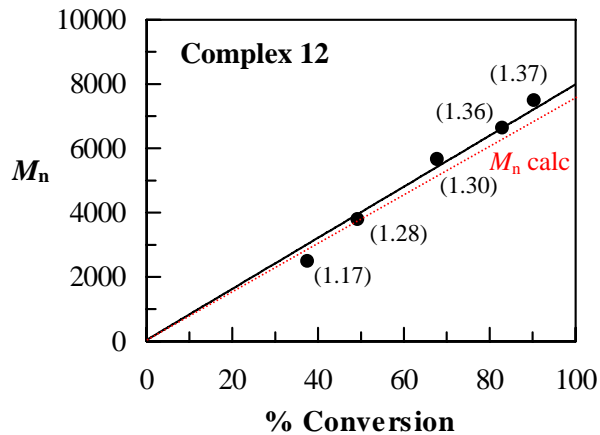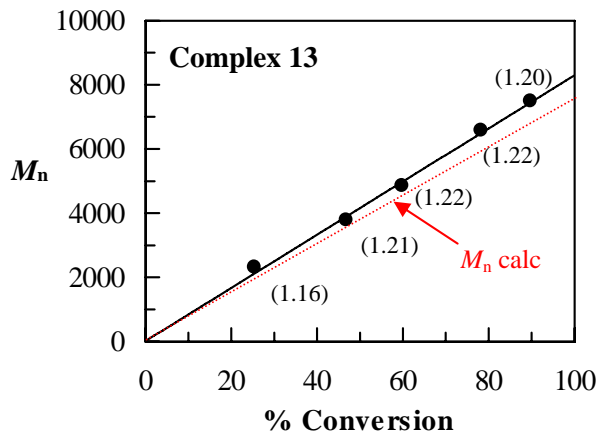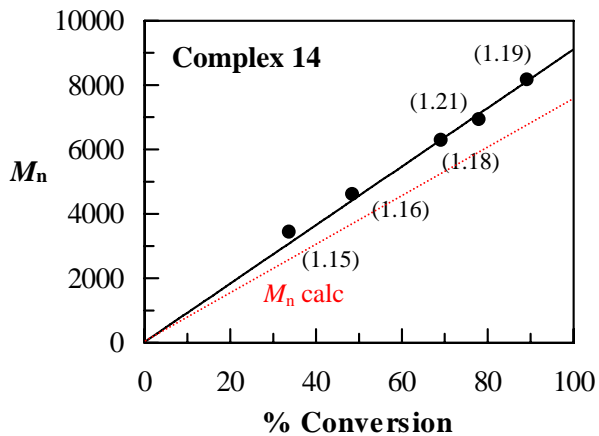

Supplement: pnas_0602765103_22.pdf [file pnas_0602765103_22.pdf]

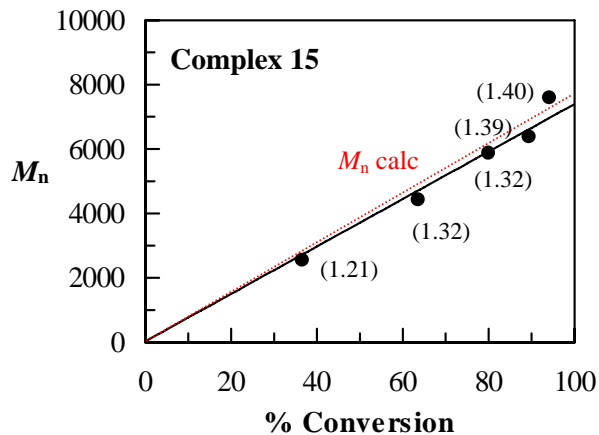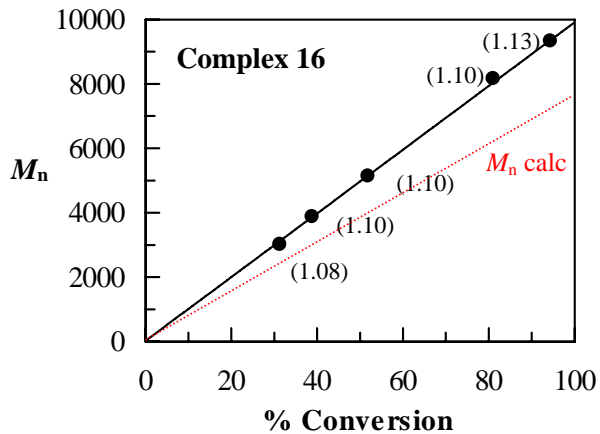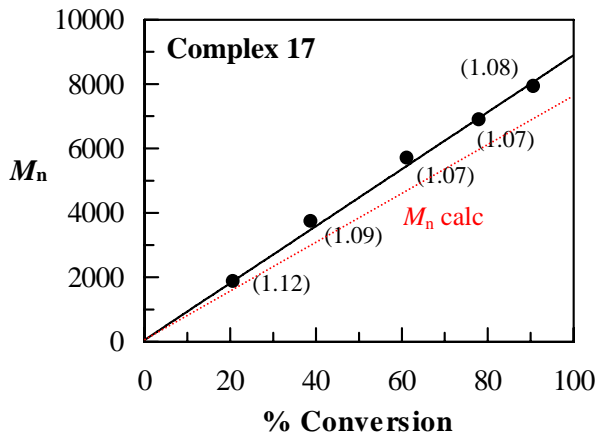

Supplement: pnas_0602765103_23.pdf [file pnas_0602765103_23.pdf]

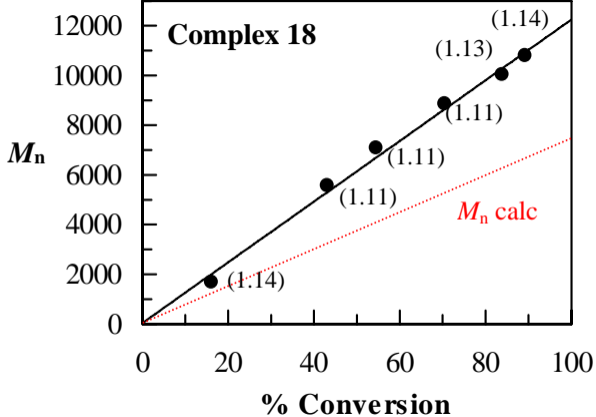

Supplement: pnas_0602765103_24.pdf [file pnas_0602765103_24.pdf]

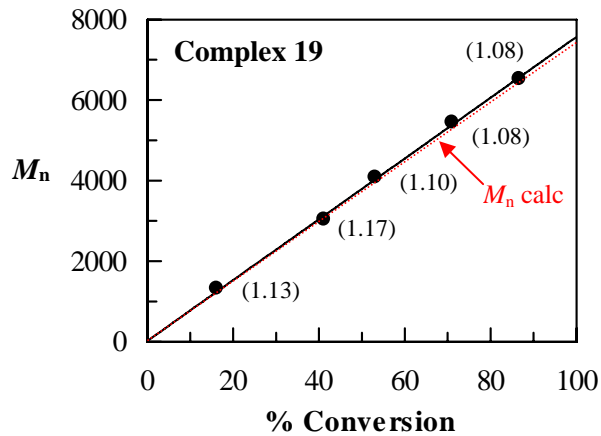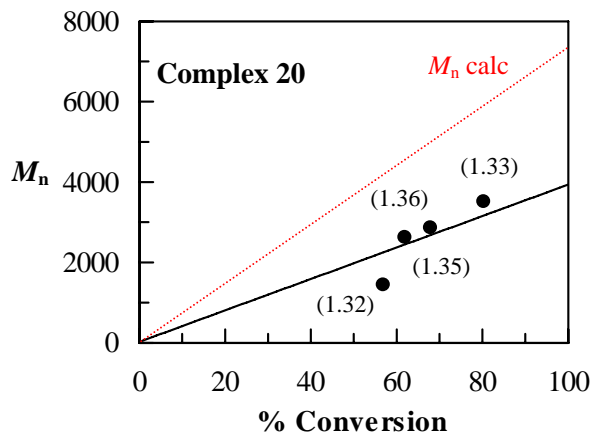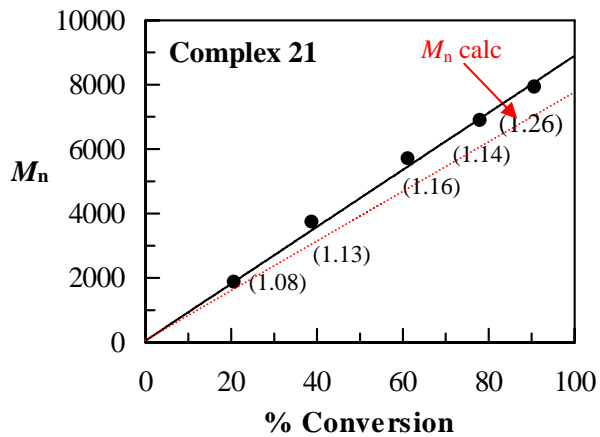

Supplement: pnas_0602765103_25.pdf [file pnas_0602765103_25.pdf]

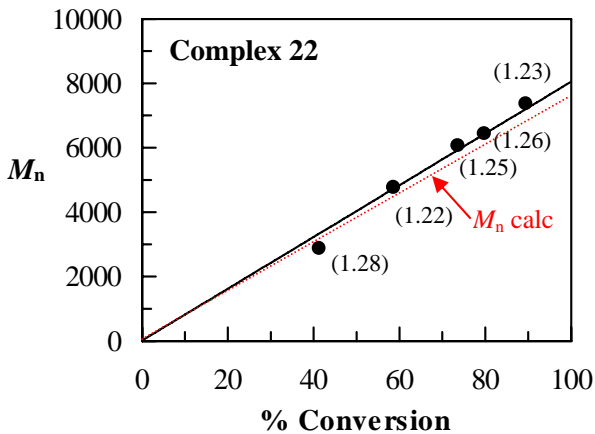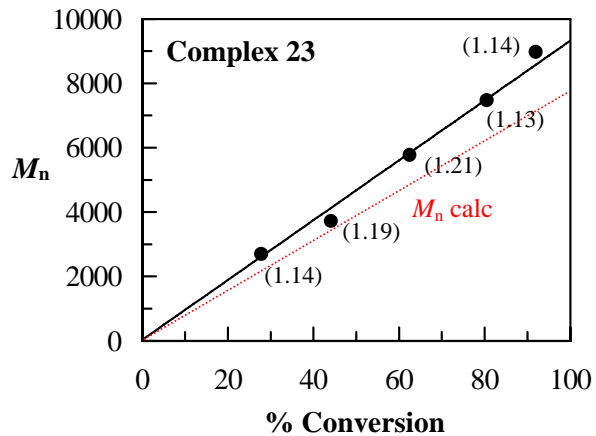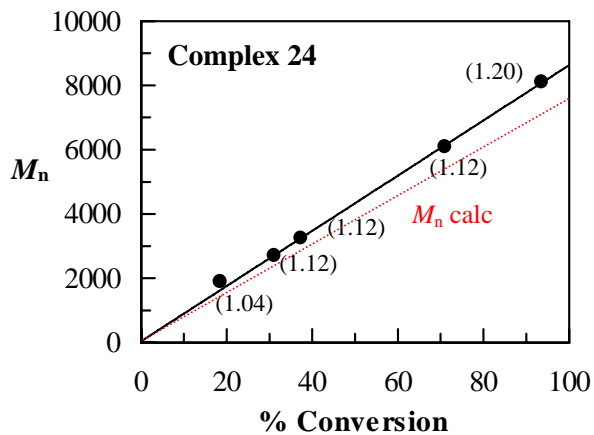

Supplement: pnas_0602765103_26.pdf [file pnas_0602765103_26.pdf]

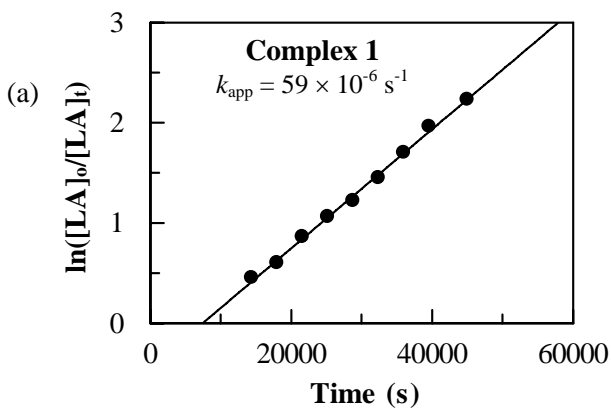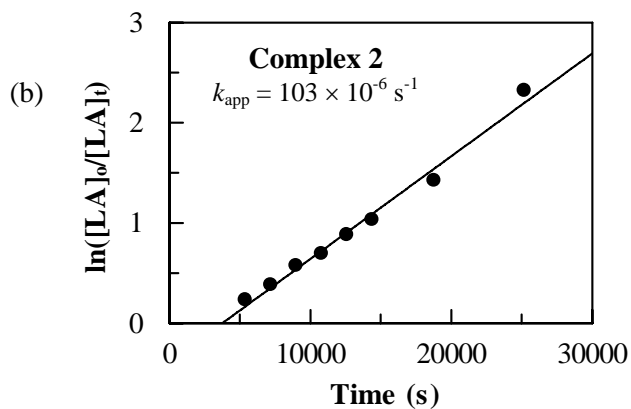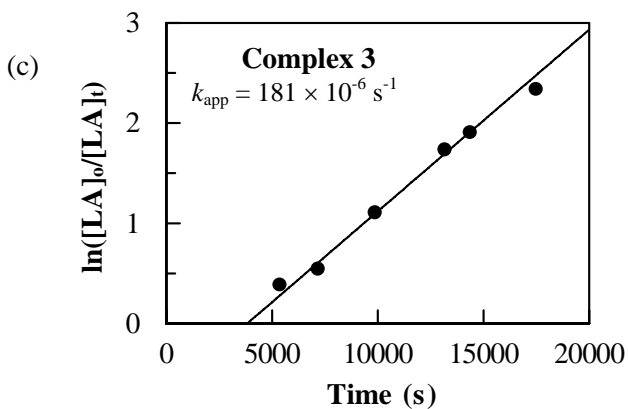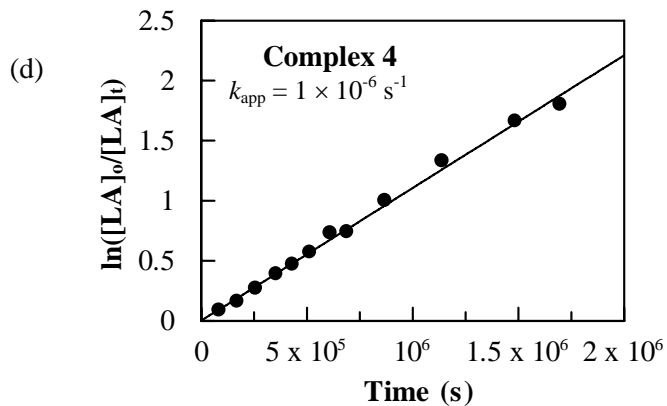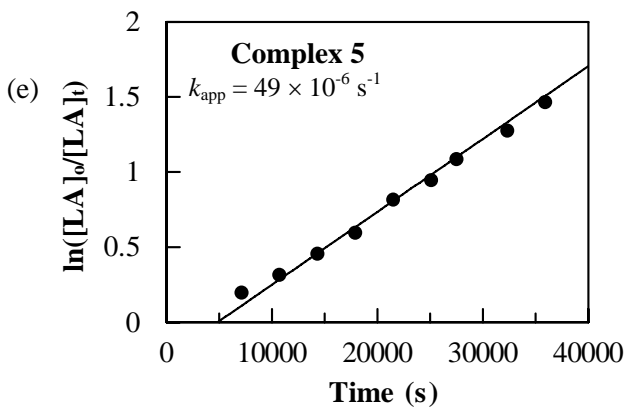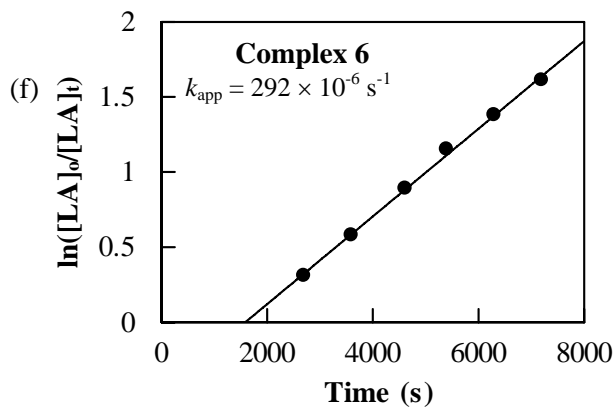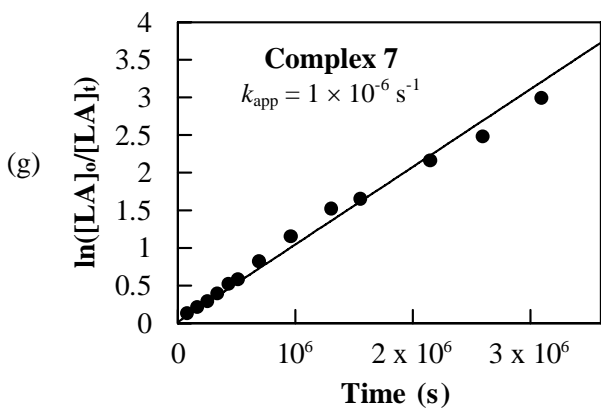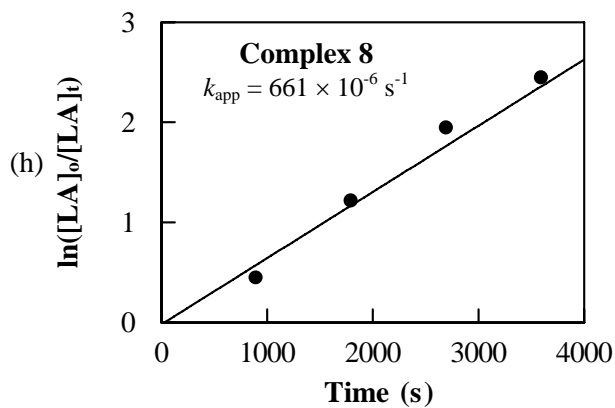

Supplement: pnas_0602765103_27.pdf [file pnas_0602765103_27.pdf]

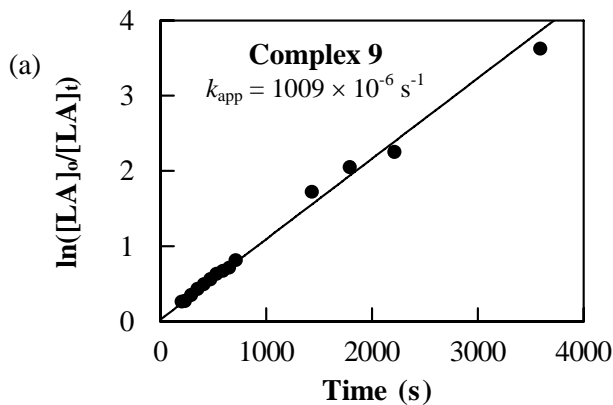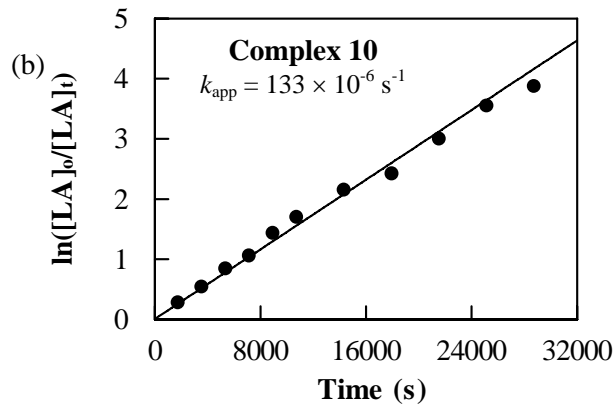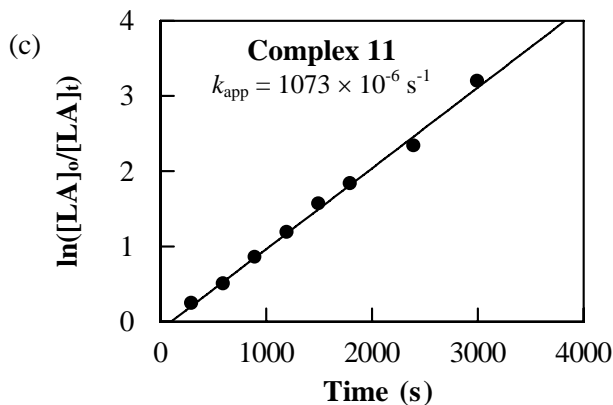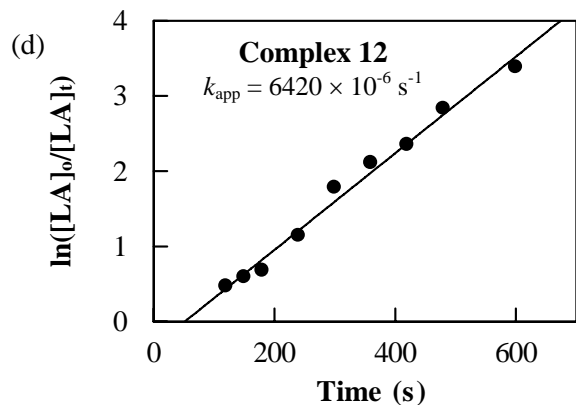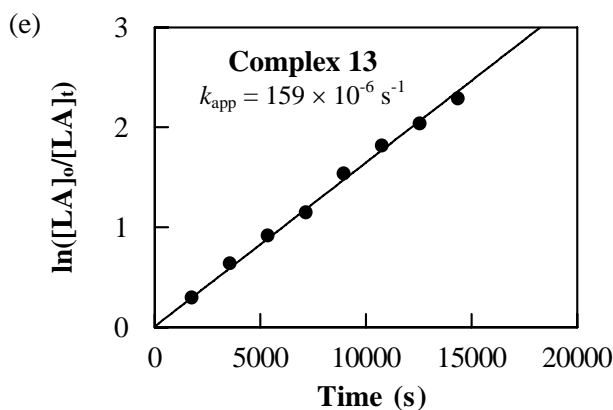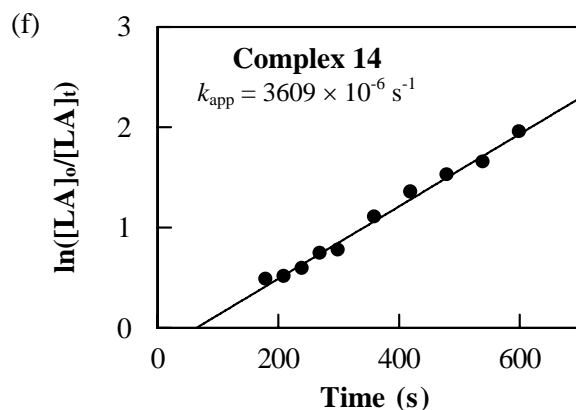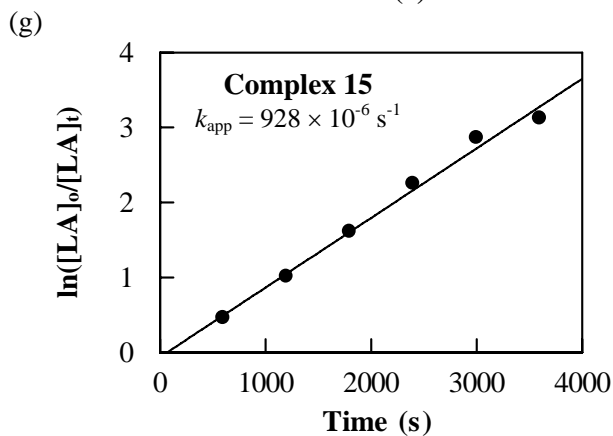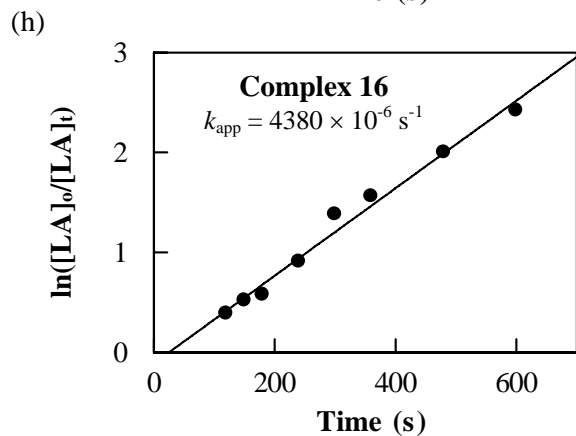

Supplement: pnas_0602765103_28.pdf [file pnas_0602765103_28.pdf]

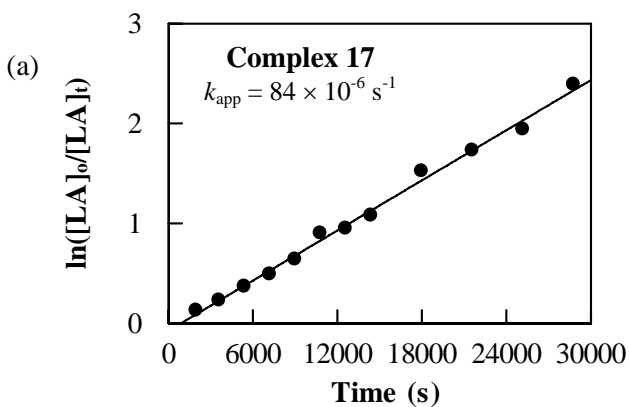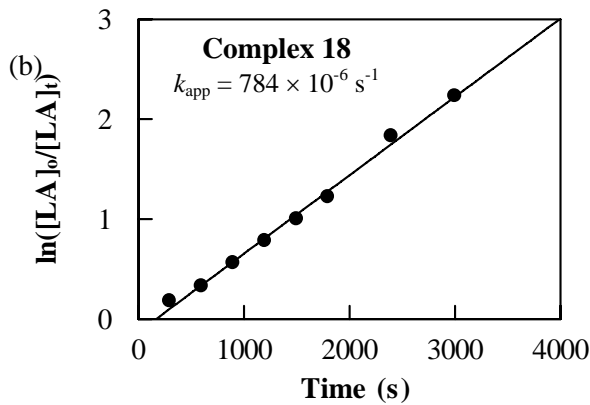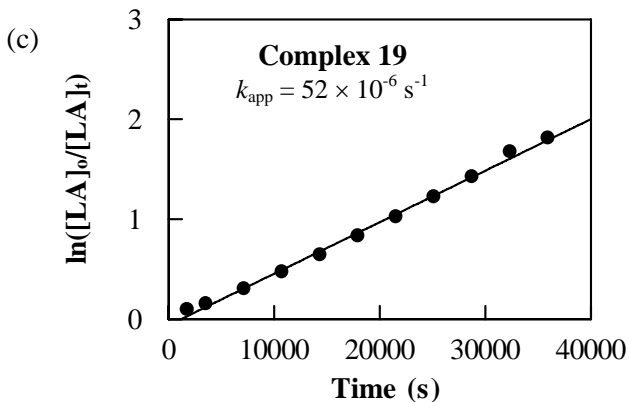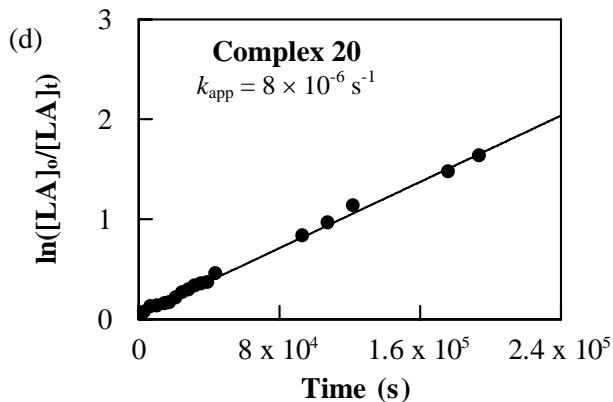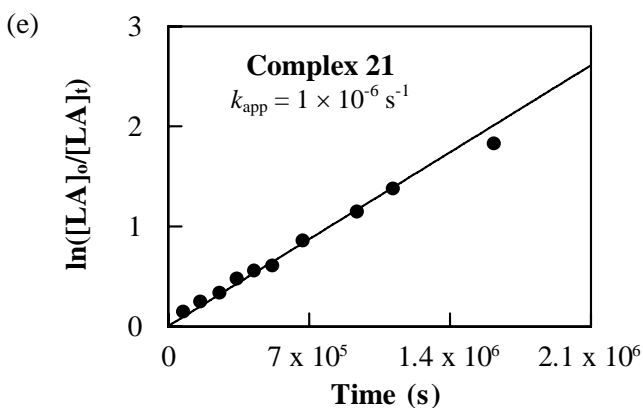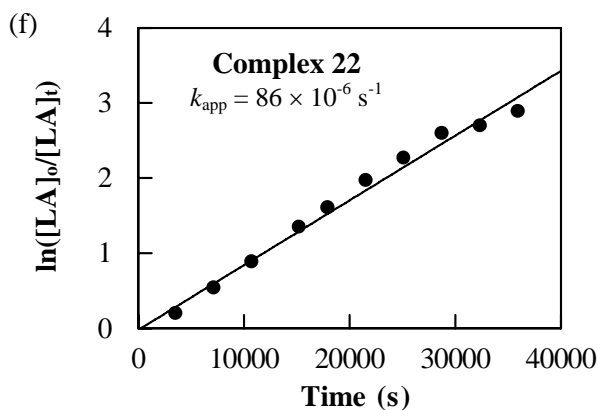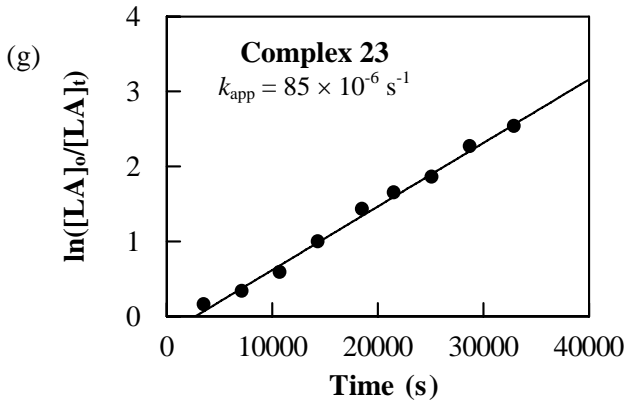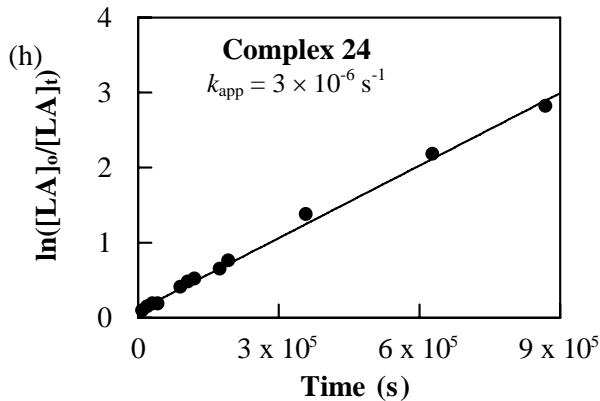

Supplement: pnas_0602765103_29.pdf [file pnas_0602765103_29.pdf]

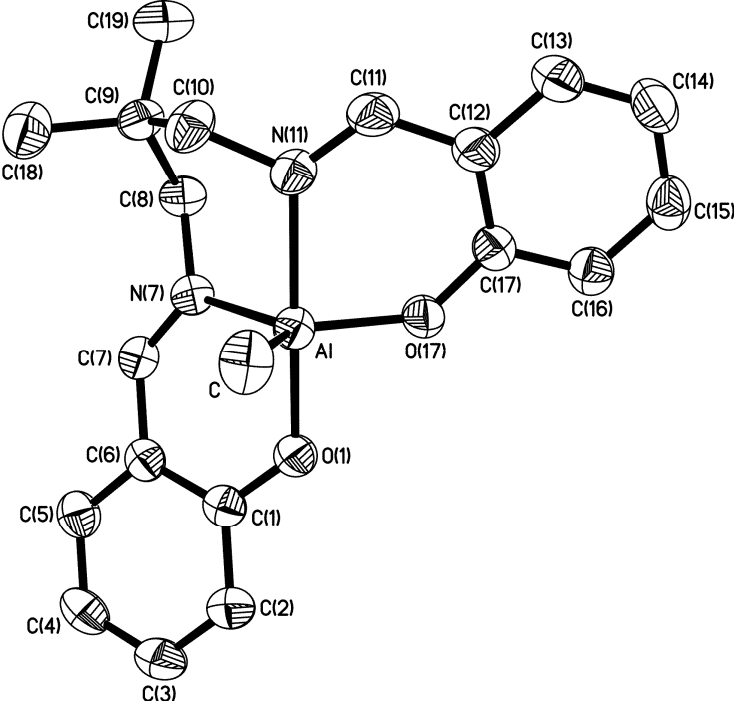

Supplement: pnas_0602765103_3.pdf [file pnas_0602765103_3.pdf]

**(a)  $P_m = 0.68$**

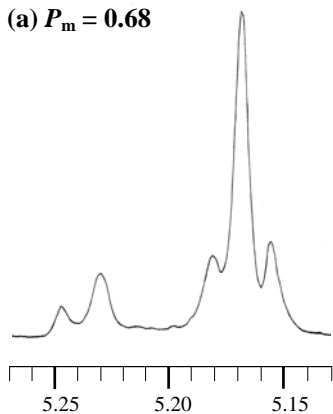

**(b)  $P_m = 0.70$**

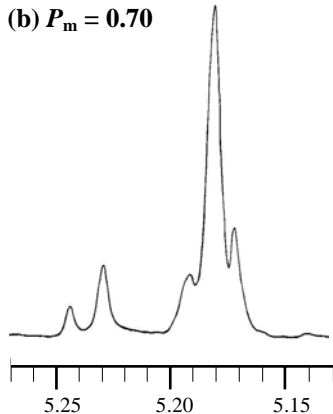

**(c)  $P_m = 0.56$**

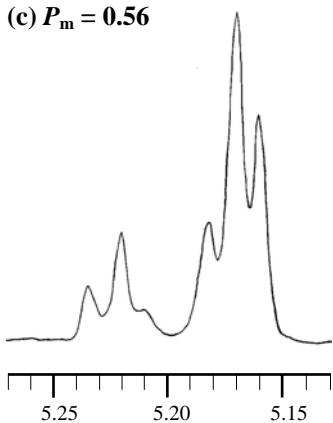

**(d)  $P_m = 0.83$**

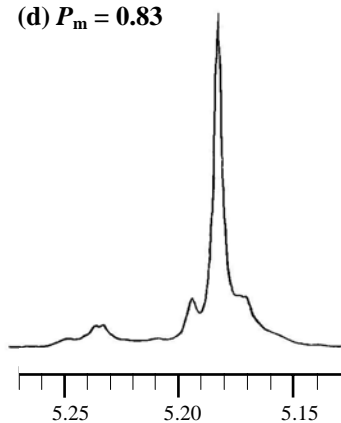

**(e)  $P_m = 0.68$**

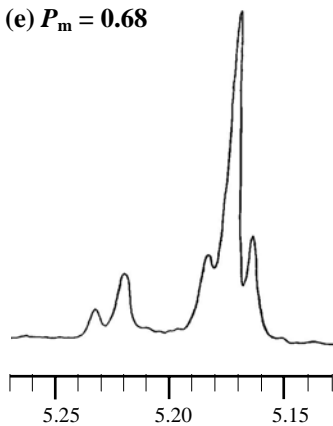

**(f)  $P_m = 0.60$**

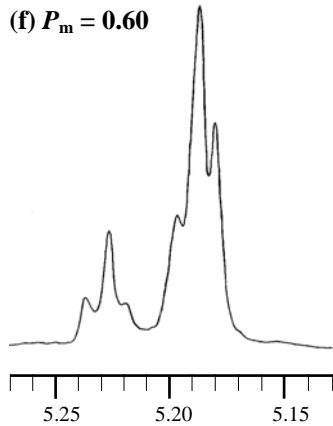

Supplement: pnas_0602765103_30.pdf [file pnas_0602765103_30.pdf]

(a)  $P_m = 0.77$

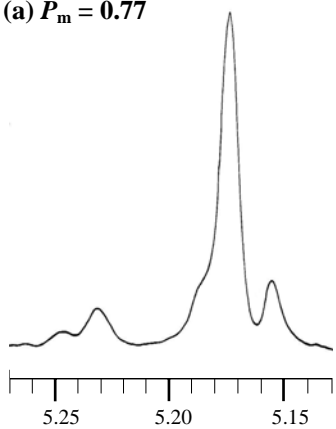

(b)  $P_m = 0.75$

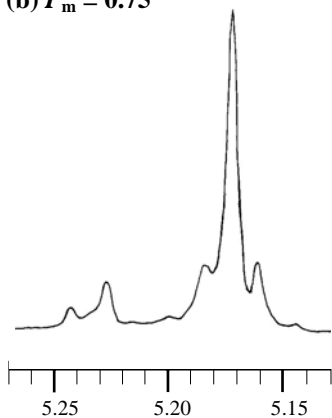

(c)  $P_m = 0.60$

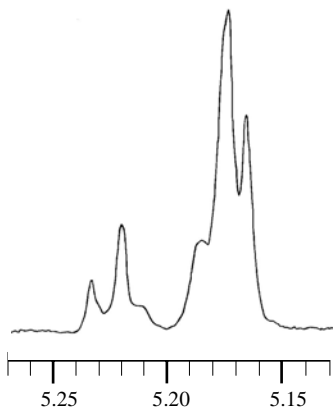

(d)  $P_m = 0.88$

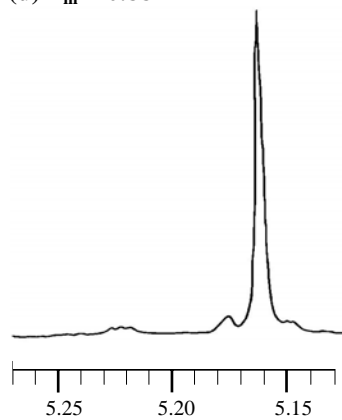

(e)  $P_m = 0.63$

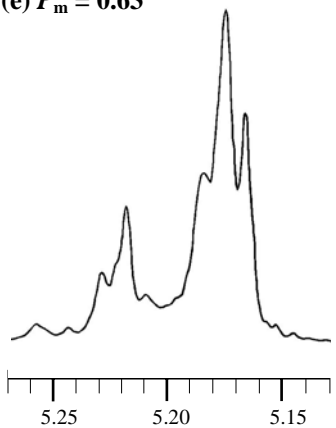

(f)  $P_m = 0.59$

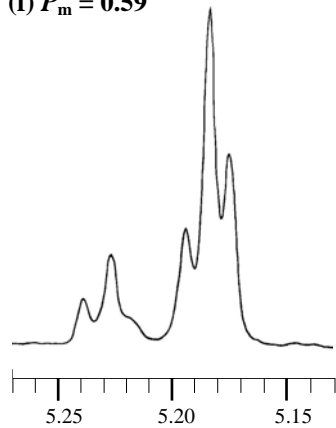

Supplement: pnas_0602765103_31.pdf [file pnas_0602765103_31.pdf]

(a)  $P_m = 0.85$

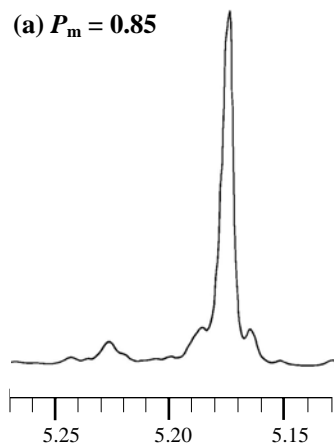

(b)  $P_m = 0.64$

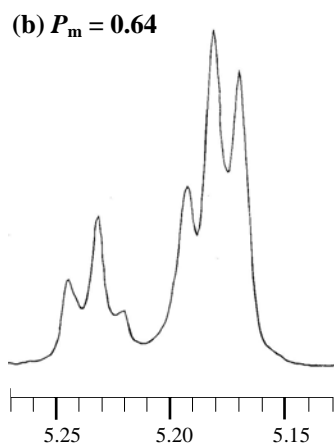

(c)  $P_m = 0.68$

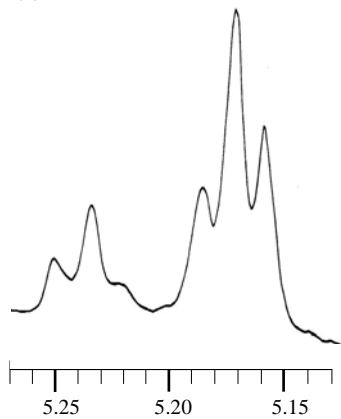

(d)  $P_m = 0.63$

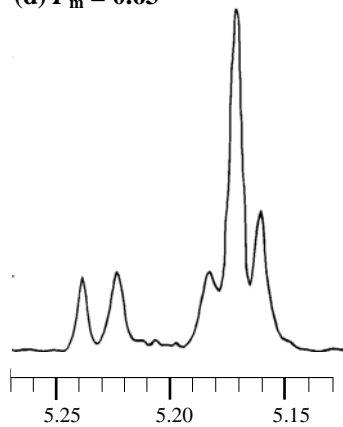

(e)  $P_m = 0.86$

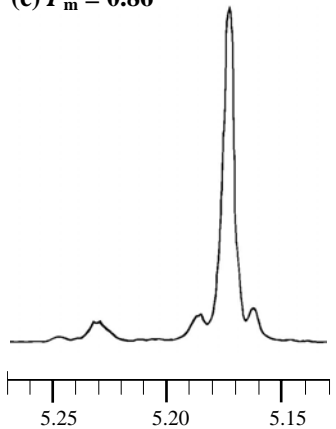

(f)  $P_m = 0.72$

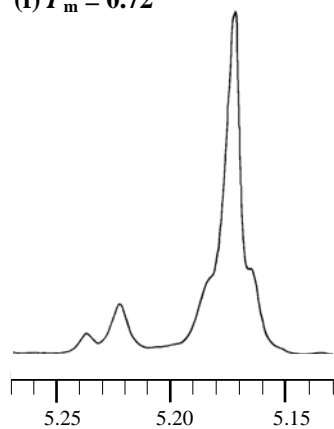

Supplement: pnas_0602765103_32.pdf [file pnas_0602765103_32.pdf]

(a)  $P_m = 0.84$

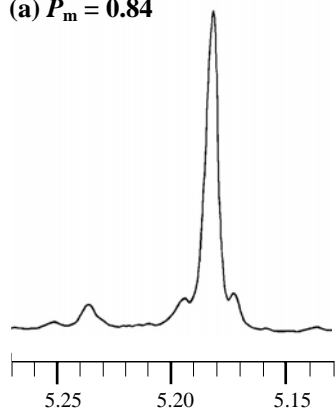

(b)  $P_m = 0.37$

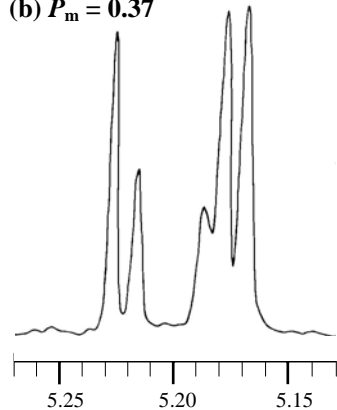

(c)  $P_m = 0.63$

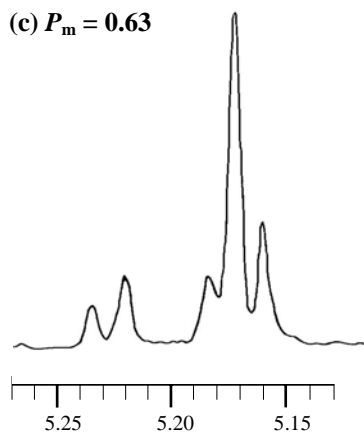

(d)  $P_m = 0.50$

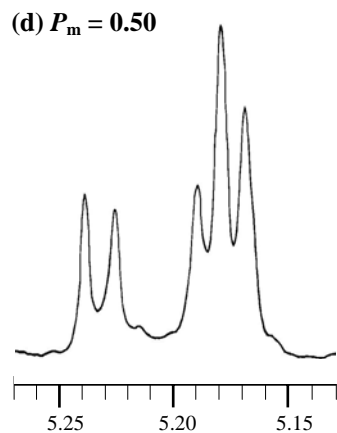

(e)  $P_m = 0.60$

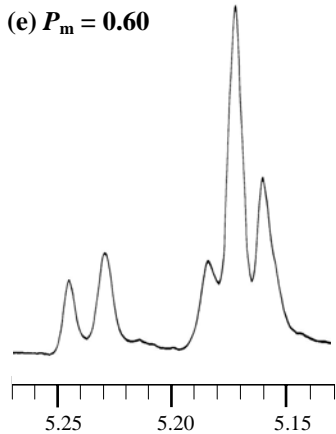

(f)  $P_m = 0.55$

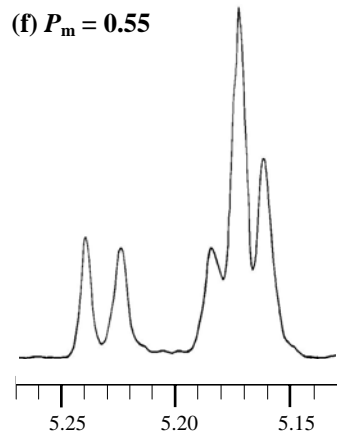

Supplement: pnas_0602765103_33.pdf [file pnas_0602765103_33.pdf]

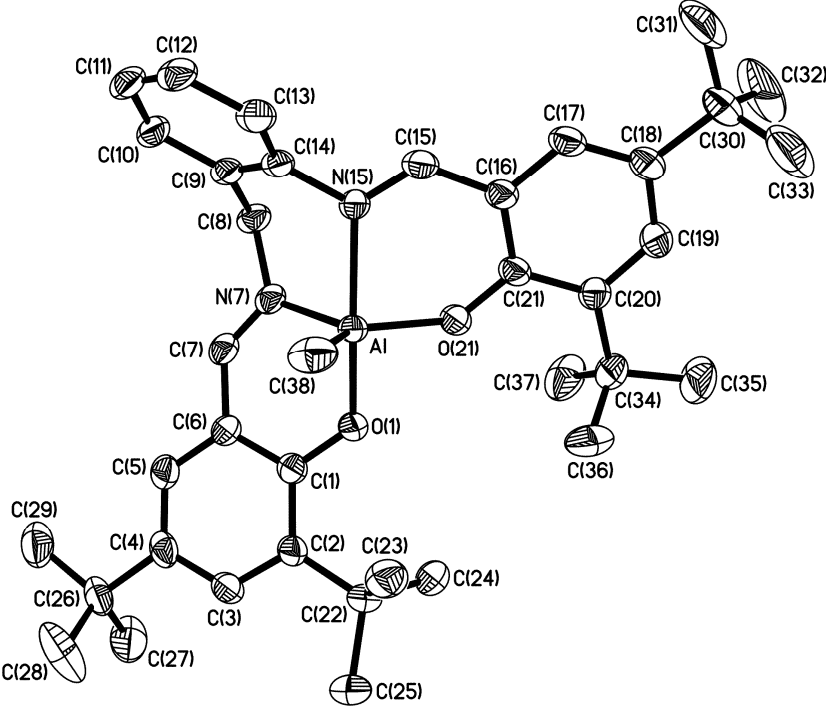

Supplement: pnas_0602765103_4.pdf [file pnas_0602765103_4.pdf]

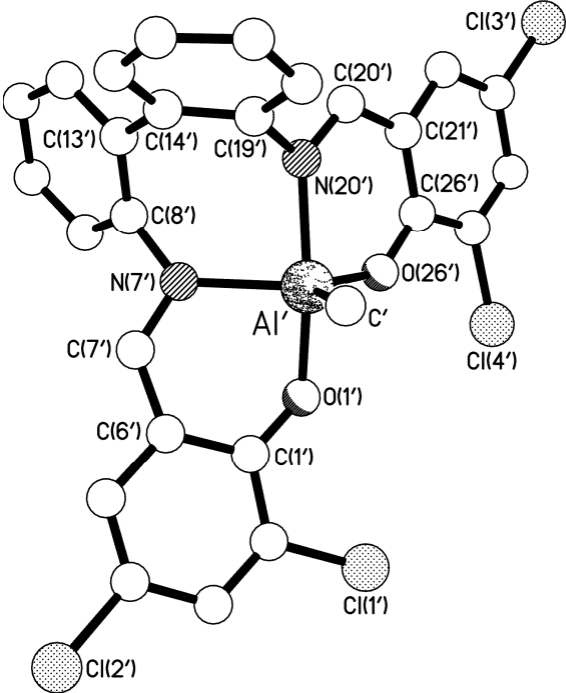

Supplement: pnas_0602765103_5.pdf [file pnas_0602765103_5.pdf]

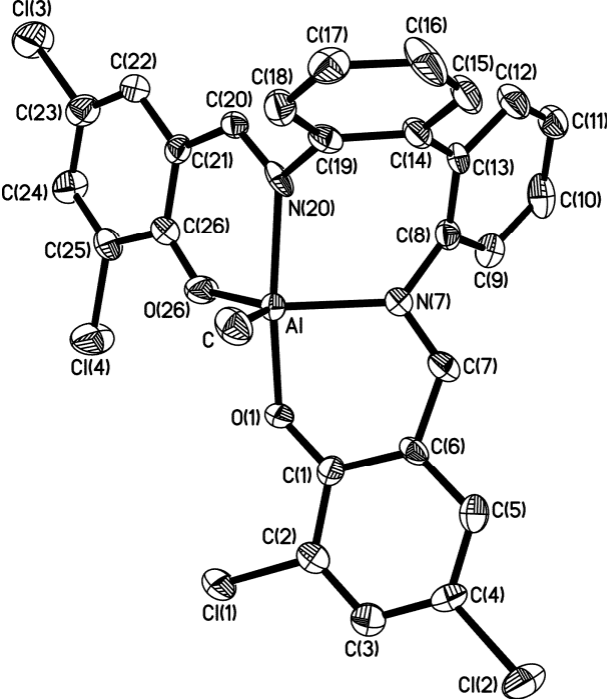

Supplement: pnas_0602765103_6.pdf [file pnas_0602765103_6.pdf]

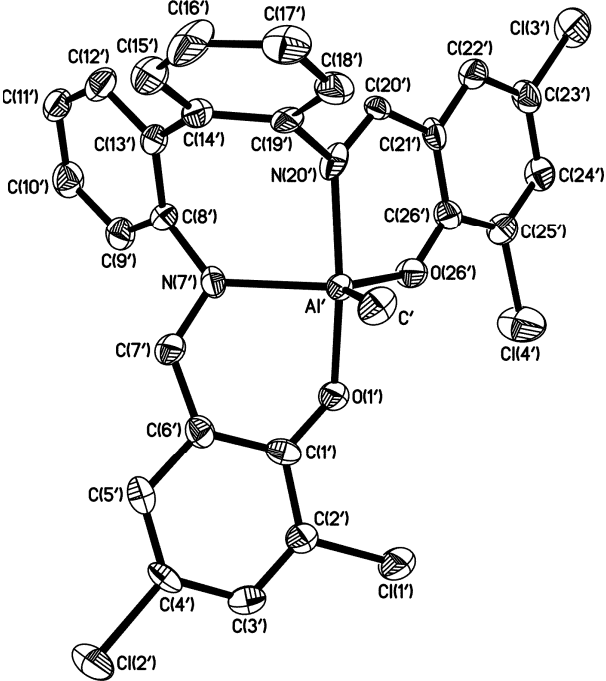

Supplement: pnas_0602765103_7.pdf [file pnas_0602765103_7.pdf]

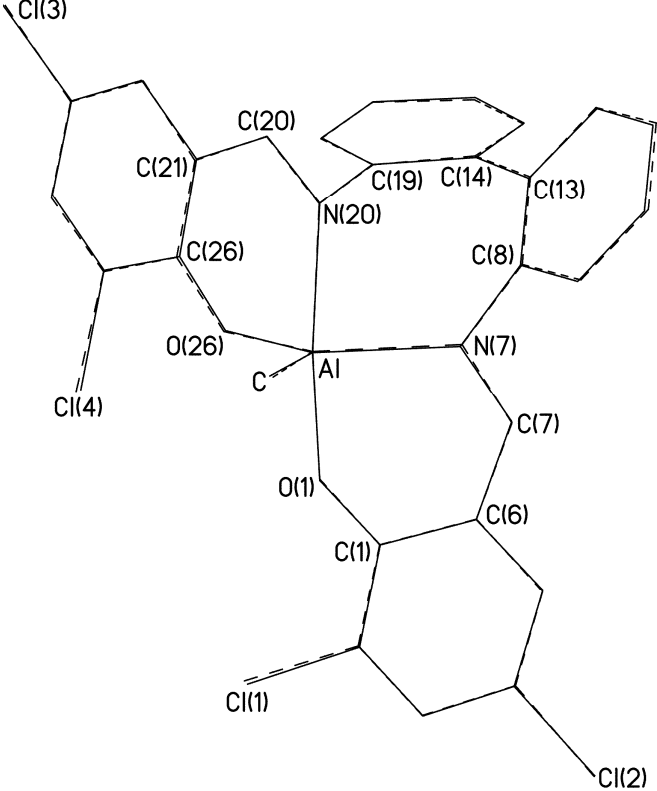

Supplement: pnas_0602765103_8.pdf [file pnas_0602765103_8.pdf]

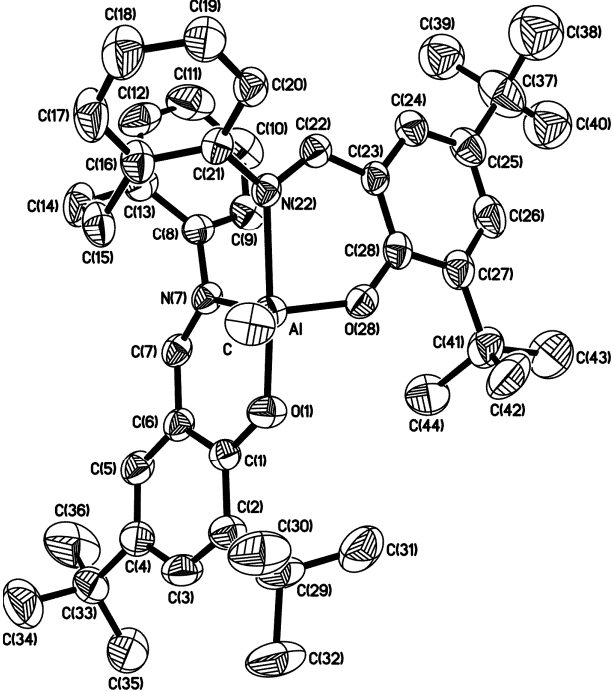

Supplement: pnas_0602765103_9.pdf [file pnas_0602765103_9.pdf]
